# Supplementary material for: The Succinate Receptor SUCNR1 Resides at the Endoplasmic Reticulum and Relocates to the Plasma Membrane in Hypoxic Conditions
Source: MDPI journal article supplement (doi:10.3390/cells11142185), 2022-07-13
Supplement: s1 [file s1]

**The succinate receptor SUCNR1 resides at the endoplasmic reticulum and relocates to the plasma membrane in hypoxic conditions**

Melanie Sanchez<sup>1,†</sup>, David Hamel<sup>2,†</sup>, Emmanuel Bajon<sup>3,†</sup>, François Duhamel<sup>2</sup>, Vikrant K. Bhosle<sup>1,4</sup>, Tang Zhu<sup>3</sup>, Jose Carlos Rivera<sup>5</sup>, Rabah Dabouz<sup>1</sup>, Mathieu Nadeau-Vallée<sup>2</sup>, Nicholas Sitaras<sup>2</sup>, David-Étienne Tremblay<sup>2</sup>, Samy Omri<sup>5</sup>, Tiffany Habelrih<sup>2</sup>, Raphael Rouget<sup>1</sup>, Xin Hou<sup>3</sup>, Fernand Gobeil<sup>6</sup>, Jean-Sebastien Joyal<sup>3,5</sup>, Przemyslaw Sapieha<sup>5</sup>, Grant Mitchell<sup>3</sup>, Alfredo Ribeiro-Da-Silva<sup>1</sup>, Mohammad Ali Mohammad Nezhady<sup>3,7,8,\*</sup> and Sylvain Chemtob<sup>1,2,3,5,8,\*</sup>

**- SUPPLEMENTARY MATERIAL -**

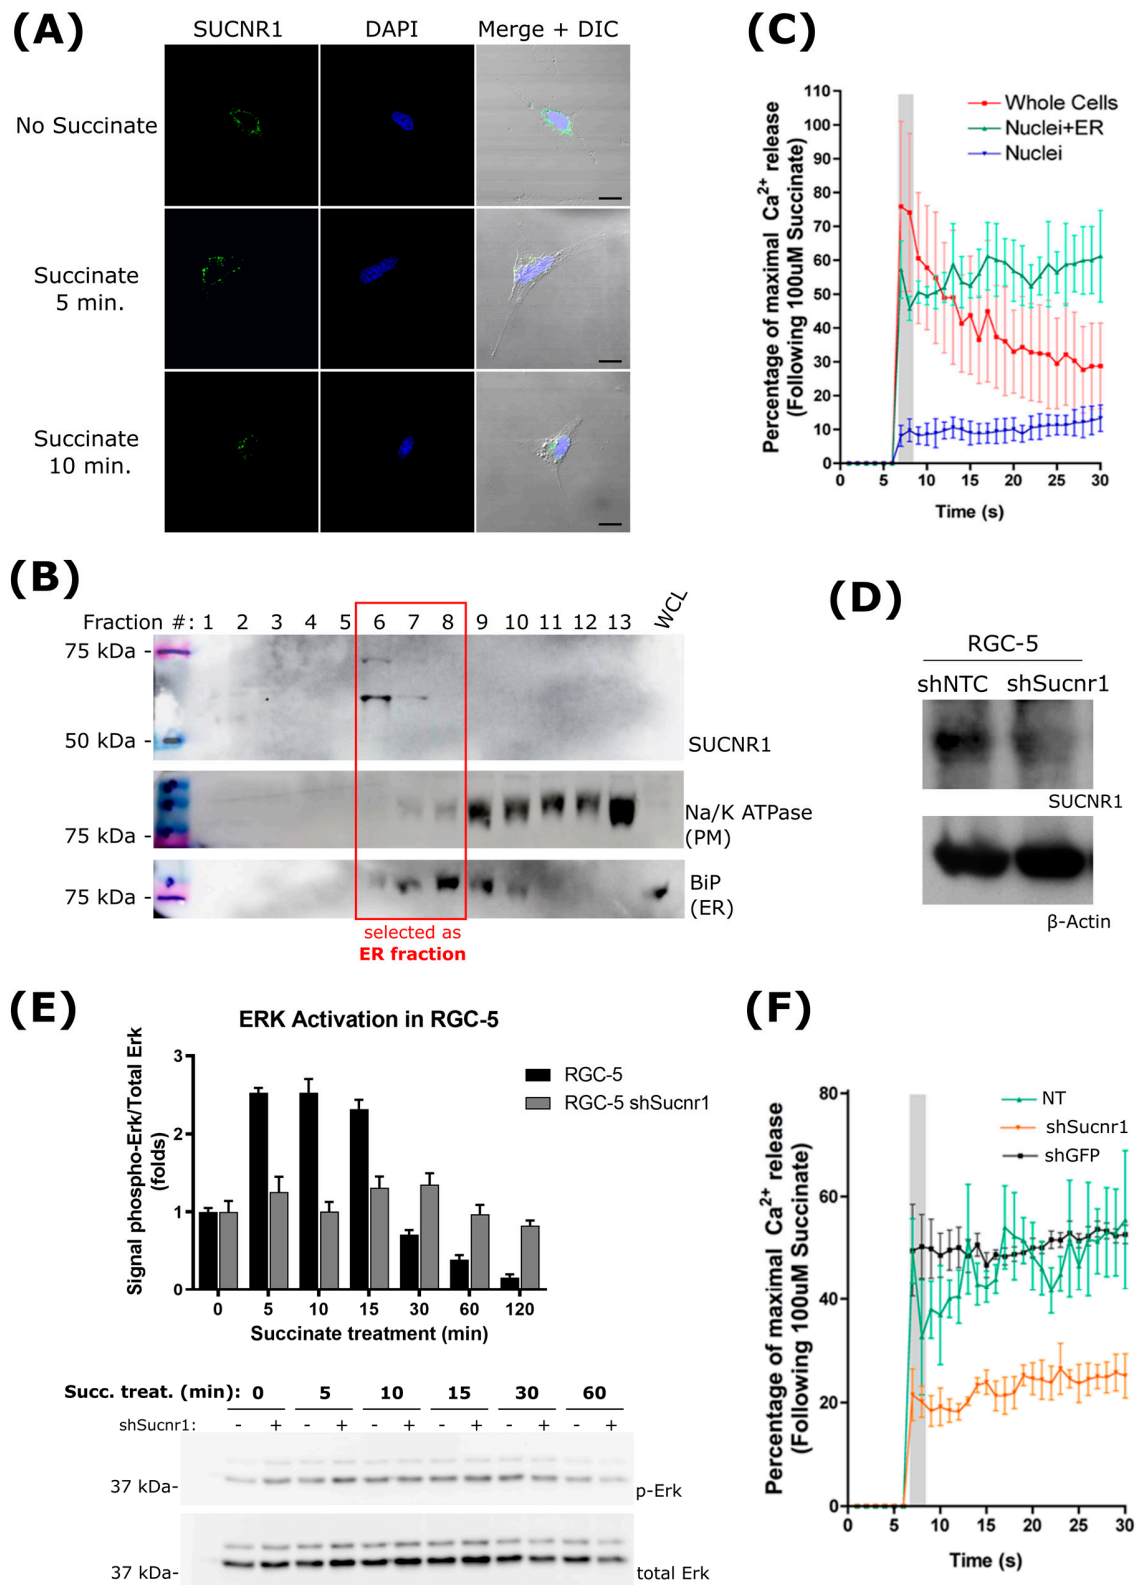

**Supplementary Figure S1: Downstream pathway of SUCNR1 stimulation in RGC**

(A) Immunohistochemistry of endogenous SUCNR1 in RGC-5 cells treated with 100  $\mu$ M succinate for 5 or 10 minutes. SUCNR1 signal is shown in green, and cell nuclei, stained with DAPI, shown in blue. Scale bars: 20  $\mu$ m. (B) Representative western-blot pictures of cell fractions purity. Each lane represents a sedimentation fraction. Na/K-ATPase and BiP immunoblots reveal the PM and ER-containing fractions, respectively. Fractions with the strongest BiP signal and least Na/K-ATPase signal were selected as ER fraction. (C) Related to **figure 1D**. FURA-2 fluorescence measurements upon succinate stimulation of RGC cell fractions shows calcium release from WC and Nucl+ER fractions but not from Nuclei only. (D) SUCNR1 and actin-b immunoblots of cell lysates from RGC-5 cells transfected with a non-targeting control (shNTC) or a SUCNR1-specific shRNA show that shSUCNR1 expression efficiently decreases SUCNR1 level. (E) RGC cells treated with 100  $\mu$ M succinate show a transient ERK activation by western blot, which is impaired when *Sucnr1* is knocked-down. For each time-point, quantification shows the signal ratio of phospho-ERK 1/2 to total ERK 1/2, relative to the initial time point. (F) Related to **figure 1F**. FURA-2 fluorescence measurements upon succinate stimulation of RGC cell Nuclei+ER fractions shows calcium release is impaired in cells carrying a shSUCNR1 plasmid.

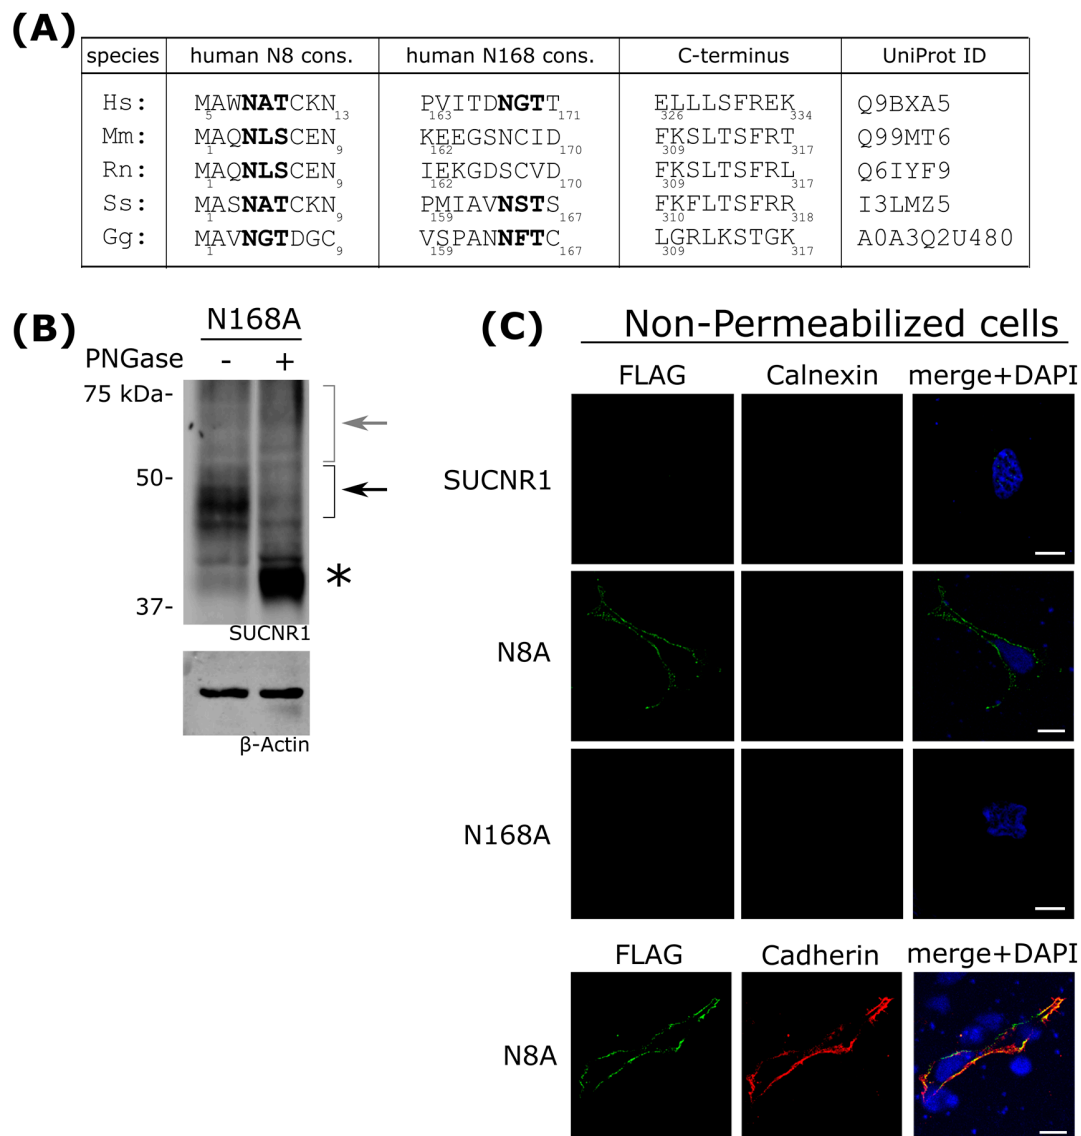

**Supplementary Figure S2: SUCNR1 phylogenetic alignment and N-glycosylation mutant localization**

**(A)** Excerpts of the relevant signals from the multiple sequence alignment (MSA) of the Human, Mouse, Rat, Pig, and Chicken (*Hs*, *Mm*, *Rn*, *Ss*, and *Gg*, resp.) SUCNR1 protein sequences. Amino-acids (aa) numbering is shown below the first and last aa of each excerpt. Provided sequences are the N-terminal and ECL2 N-glycosylation sites (indicated in bold), showing the former is conserved but not the latter. Also shown are the C-terminal sequences showing that none contains the canonical KKXX sequence, and the UniProt ID used for the MSA. **(B)** Related to **figure 2C**. Transfected HEK 293T whole cell lysates were treated with PNGaseF to fully deglycosylate proteins. After treatment, SUCNR1 migrates to its theoretical molecular weight of 37 kDa (\*). Fully glycosylated and partially glycosylated receptors are indicated by grey and black arrows, resp. **(C)** Related to **figure 2D**. Cellular localization of FLAG-SUCNR1 by confocal microscopy in Non-Permeabilized cells. HEK 293T cells were transfected with FLAG-tagged wt-, N8A-, or N168A mutant SUCNR1 constructs and subjected to IF against FLAG tags (shown in green).

## SANCHEZ et al. SUPPLEMENTARY MATERIAL

Calnexin was used as an ER marker, pan-cadherin was used as a Plasma-membrane marker (red), and nuclei were stained with DAPI (blue). Scale bars: 20  $\mu\text{m}$ .

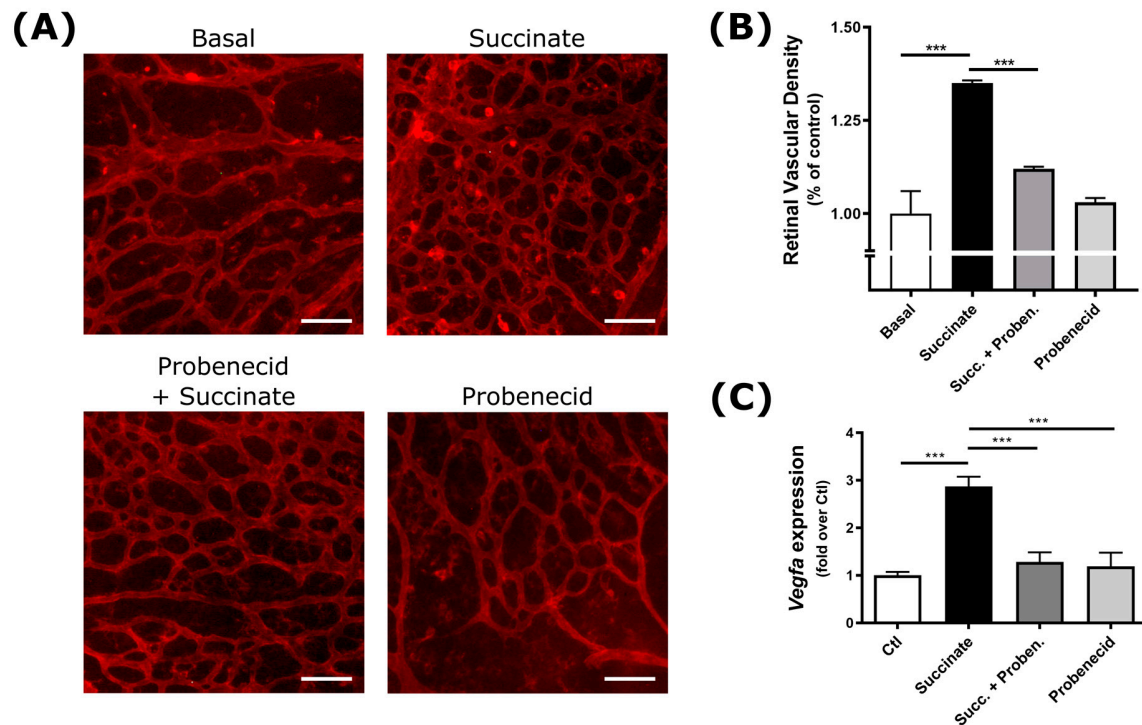

**Supplementary Figure S3: Probenecid impairs succinate-induced vascularization and Vegfa expression**

**(A)** Representative pictures of lectin-stained superficial retina vessels from P8 WT mice injected or not at P4 with succinate (100  $\mu$ M final concentration), and with or without the organic anion transporters inhibitor probenecid (1mM final concentration). Scale bars: 100  $\mu$ m. **(B)** Quantifications of superficial retina vascular density prepared as in (A). **(C)** In RGC-5 cells, *Vegfa* expression increases after a 4-hours 100  $\mu$ M succinate treatment (black bar), co-administration of Probenecid abolishes this expression (dark grey). \*\*\* $p$ <0.001 vs comparative value.

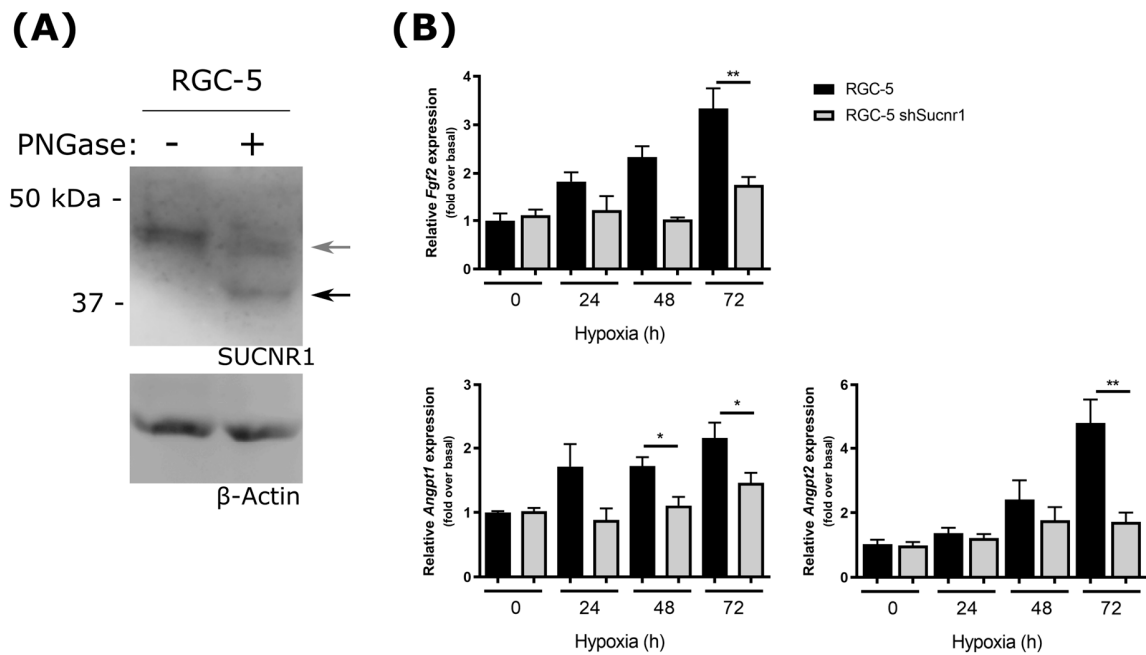

**Supplementary Figure S4: SUCNR1 deglycosylation in hypoxia affects downstream gene expression in RGC-5 cells**

(A) SUCNR1 is glycosylated in RGC. RGC-5 cell lysates were treated with PNGaseF, which led to a migration shift of SUCNR1 from its glycosylated form (grey arrow) to its theoretical molecular weight of 37 KDa (black arrow). (B) Gene expression in cells knocked-down for SUCNR1 during hypoxia. RGC-5 cells expressing an shRNA against SUCNR1 or not were cultured in hypoxic conditions for the indicated times before lysis and RT-qPCR quantification of *Fgf2*, *Angpt1*, and *Angpt2* expression. Black bars: shCTL ; Grey bars: shSUCNR1. N=4; \*p<0.05, \*\*p<0.01 vs comparative value.

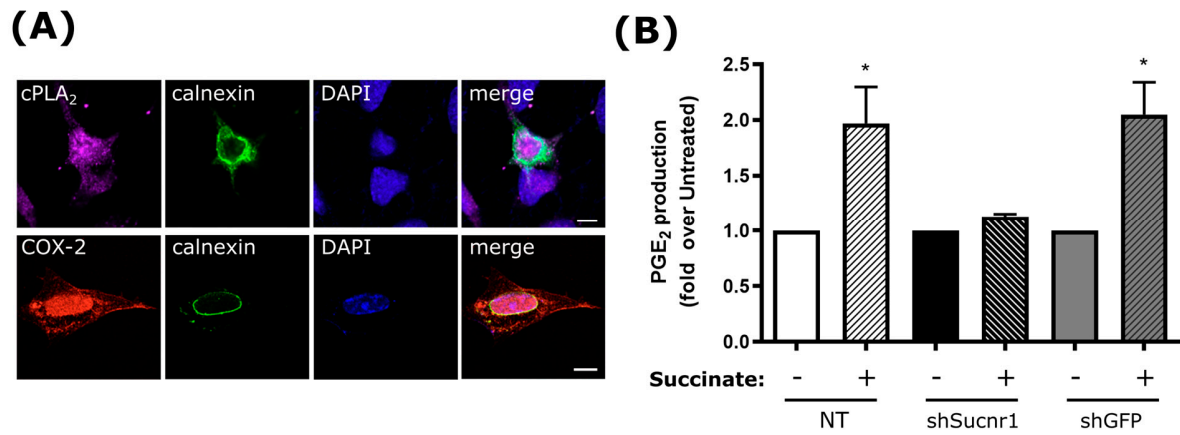

**Supplementary Figure S5: PGE production upon succinate treatment in RGC**

**(A)** In RGC-5 cells, COX-2 and cPLA<sub>2</sub> immunofluorescence show a signal colocalizing with both nuclei (DAPI staining, blue) and calnexin (IF, green). Scale bars: 20  $\mu$ m. **(B)** ELISA quantification of PGE<sub>2</sub> in RGC-5 cells non-transfected (white bars), expressing an shRNA construct against SUCNR1 (black bars), or GFP (grey bars), and treated (striped bars) or not (plain bars) with Succinate; NT: non-transfected. N=4; \*p<0.05 vs comparative value.
